# Supplementary material for: Tuning silver(I) coordination architectures by ligands design: from dinuclear, trinuclear, to 1D and 3D frameworks
Source: Royal Society of Chemistry journal article supplement (doi:10.1039/b810773d), 2008-01-01
Supplement: b810773d.pdf [file b810773d.pdf]

## Electronic Supporting Information

### Tuning Silver(I) Coordination Architectures by Ligands Design: from Dinuclear, Trinuclear, to 1D and 3D Frameworks

Jian-Long Du, Tong-Liang Hu, Shu-Ming Zhang, Yong-Fei Zeng and Xian-He  
Bu\*

XRPD, TG-DTA, and Solid state CD spectra of **2**

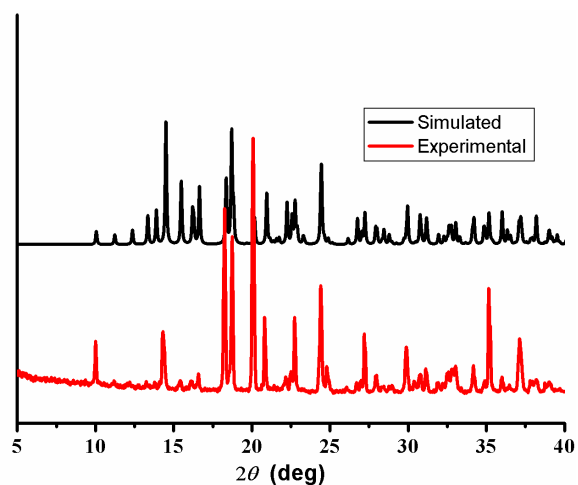

Fig. S1. XRPD for **2**

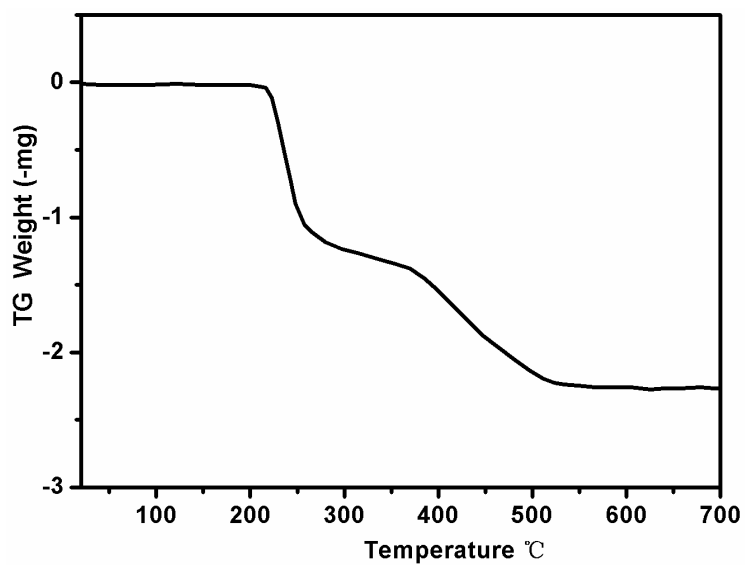

Fig. S2. TG-DTA for 2.

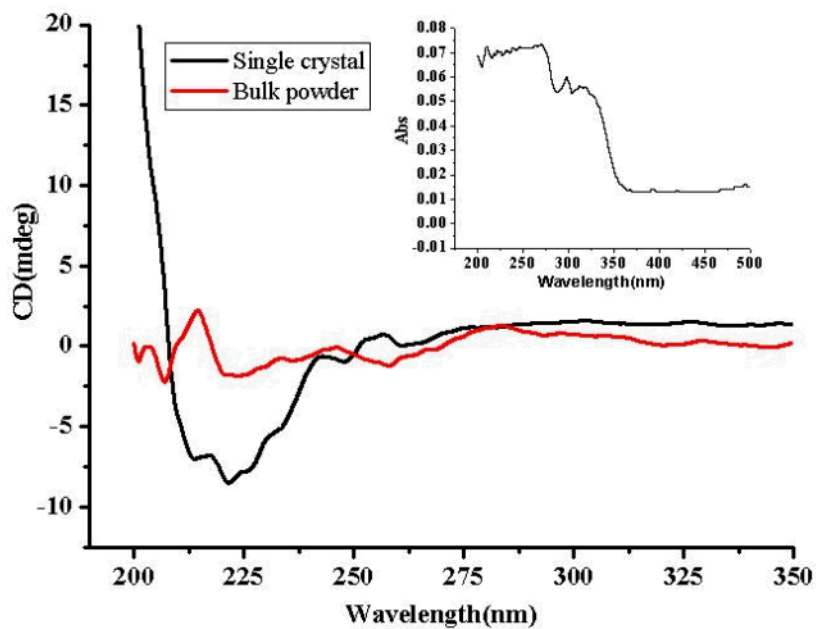

Fig. S3. Solid state CD spectra of 2 (inset: solid-state UV absorption spectrum of 2)
